# Supplementary material for: Characterization of Volatile Profiles and Correlated Contributing Compounds in Pan-Fried Steaks from Different Chinese Yellow Cattle Breeds through GC-Q-Orbitrap, E-Nose, and Sensory Evaluation
Source: MDPI journal article supplement (doi:10.3390/molecules27113593), 2022-06-02
Supplement: s1 [file s1]

## Article

# Characterization of Volatile Profiles and Correlated Contributing Compounds in Pan-Fried Steaks from Different Chinese Yellow Cattle Breeds through GC-Q-Orbitrap, E-Nose, and Sensory Evaluation

Meng Wei <sup>1,2</sup>, Xiaochang Liu <sup>1</sup>, Peng Xie <sup>1</sup>, Yuanhua Lei <sup>1</sup>, Haojie Yu <sup>1</sup>, Aiyun Han <sup>2</sup>, Libin Xie <sup>2</sup>, Hongliang Jia <sup>3</sup>, Shaohua Lin <sup>3</sup>, Yueyu Bai <sup>4,5</sup>, Baozhong Sun <sup>1</sup> and Songshan Zhang <sup>1,\*</sup>

<sup>1</sup> Institute of Animal Sciences, Chinese Academy of Agricultural Sciences, Beijing 100193, China; weimeng@caas.cn (M.W.); lxc\_cau@163.com (X.-c.L.); seulbird@163.com (P.X.); leiyuanhua-1@163.com (Y.-h.L.); haojie-yu@foxmail.com (H.-j.Y.); baozhongsun@163.com (B.-z.S.)

<sup>2</sup> Chemical Engineering Institute, Shijiazhuang University, Shijiazhuang 050035, China; irene0001@126.com (A.-y.H.); xielibin827@163.com (L.-b.X.)

<sup>3</sup> Department of Food and Biological Engineering, Beijing Vocational College of Agriculture, Beijing 102442, China; jiahongliang@bvca.edu.cn (H.-l.J.); lsh\_hp@sina.com (S.-h.L.)

<sup>4</sup> Henan Animal Health Supervision, Zhengzhou 450000, China; baiyueyu666@sina.com

<sup>5</sup> School of Agricultural Sciences, Zhengzhou University, Zhengzhou 450000, China

\* Correspondence: zhangsongshan@caas.cn

**Table S1.** Qualitative and quantitative analyses of volatile organic compounds (VOCs) of pan-fried steaks from different yellow cattle breeds.

| Type<br>s of<br>VOC<br>s | N<br>O. | Compounds Information       |                                         | Relative contents of VOCs (µg/kg) |               |                |                |                |                |               | SE<br>M     |
|--------------------------|---------|-----------------------------|-----------------------------------------|-----------------------------------|---------------|----------------|----------------|----------------|----------------|---------------|-------------|
|                          |         | Component Name              | Cal-<br>cu-<br>lated<br>RI <sup>x</sup> | Li-<br>brary<br>RI <sup>y</sup>   | BH            | JX             | YL             | WS             | XJ             | PL            |             |
| Alde-<br>hyde<br>s       | 1       | Acetaldehyde                | 706                                     | 702                               | 462.92<br>b   | 780.86a        | 551.79<br>b    | 771.33a        | 753.15a        | 755.44a       | 51.6<br>7   |
|                          | 2       | Butanal                     | 906                                     | 877                               | 74.08c        | 115.36<br>b    | 86.81c         | 126.48a<br>b   | 130.97a<br>b   | 145.60a       | 9.06        |
|                          | 3       | 3-Methyl-butanal            | 921                                     | 923                               | 53.75c        | 90.01c         | 51.31c         | 73.52c         | 139.77<br>b    | 206.48a       | 12.7<br>7   |
|                          | 4       | Pentanal                    | 983                                     | 991                               | 78.78b        | 86.59b         | 200.12a<br>b   | 376.03a        | 275.22a        | 327.56a       | 56.8<br>4   |
|                          | 5       | Hexanal                     | 1086                                    | 1098                              | 2591.35<br>b  | 2864.51<br>b   | 7626.23<br>ab  | 12495.0<br>7a  | 9546.86<br>ab  | 11539.1<br>5a | 2224<br>.46 |
|                          | 6       | Heptanal                    | 1190                                    | 1192                              | 619.65c       | 475.61c        | 1257.02<br>bc  | 3104.26<br>a   | 1446.47<br>bc  | 2147.91<br>ab | 411.<br>08  |
|                          | 7       | Octanal                     | 1295                                    | 1298                              | 492.43c       | 465.04c        | 1266.89<br>b   | 2348.26<br>a   | 904.80<br>bc   | 1528.70<br>b  | 215.<br>90  |
|                          | 8       | (E)-2-Heptenal              | 1332                                    | 1335                              | 22.33b        | 26.72b         | 57.74a<br>b    | 93.63a         | 86.05a         | 81.74a        | 14.1<br>6   |
|                          | 9       | Nonanal                     | 1400                                    | 1402                              | 1984.34<br>d  | 1672.72<br>d   | 6919.63<br>b   | 12250.1<br>8a  | 3607.64<br>cd  | 6133.55<br>bc | 1018<br>.44 |
|                          | 10      | (E)-2-Octenal               | 1438                                    | 1441                              | 161.06<br>b   | 193.96<br>b    | 450.27a<br>b   | 641.19a        | 565.28a        | 660.01a       | 102.<br>25  |
|                          | 11      | Decanal                     | 1506                                    | 1508                              | 84.27c        | 85.31c         | 186.05<br>b    | 311.87a        | 159.36<br>bc   | 158.39<br>bc  | 28.5<br>4   |
|                          | 12      | Benzaldehyde                | 1537                                    | 1541                              | 14837.1<br>3d | 21394.3<br>3bc | 18745.5<br>7cd | 27236.6<br>5ab | 24484.8<br>8bc | 32321.4<br>4a | 1989<br>.02 |
|                          | 13      | (E)-2-Nonenal               | 1545                                    | 1547                              | 223.84<br>b   | 218.94<br>b    | 419.57<br>b    | 838.83a        | 555.05a<br>b   | 932.20a       | 127.<br>47  |
|                          | 14      | (E)-2-Decenal               | 1654                                    | 1644                              | 34.38d        | 34.46d         | 93.54bc        | 164.27a        | 61.97c<br>d    | 113.04<br>b   | 13.6<br>8   |
|                          | 15      | Benzeneacetaldehyde         | 1657                                    | 1661                              | 2451.95<br>c  | 3139.09<br>bc  | 2812.43<br>bc  | 4040.99<br>b   | 5624.90<br>a   | 6305.57<br>a  | 422.<br>71  |
|                          | 16      | 4-Ethyl-benzaldehyde        | 1724                                    | 1721                              | 20.00d        | 31.59c<br>d    | 63.79bc<br>d   | 95.38b         | 81.66bc        | 150.61a       | 17.1<br>3   |
|                          | 17      | E-Citral                    | 1742                                    | 1744                              | 1.06d         | 1.17d          | 13.26b         | 32.94a         | 2.60c          | 3.83c         | 0.46        |
|                          | 18      | (E)-2-Undecenal             | 1762                                    | 1751                              | 125.58<br>d   | 126.48<br>d    | 285.71<br>bc   | 411.62a        | 212.66c<br>d   | 374.47a<br>b  | 36.5<br>9   |
|                          | 19      | (E,Z)-2,4-Decadienal        | 1775                                    | 1754                              | 11.68b        | 13.37b         | 27.58a<br>b    | 45.81a         | 34.29a         | 44.36a        | 5.64        |
|                          | 20      | (E,E)-2,4-Decadienal        | 1822                                    | 1823                              | 15.60b        | 17.36b         | 29.09a<br>b    | 41.29a         | 47.60a         | 48.90a        | 6.76        |
|                          | 21      | 4-Pentyl-benzalde-<br>hyde  | 2023                                    | 2003                              | 12.41d        | 22.57c<br>d    | 40.01bc        | 50.35b         | 57.63b         | 84.44a        | 7.89        |
|                          | 22      | 4-Methoxy-benzalde-<br>hyde | 2045                                    | 2011                              | 19.18d        | 25.02c<br>d    | 73.96b         | 166.36a        | 37.90c         | 30.57c<br>d   | 4.67        |
| Alco-<br>hols            | 23      | Isopropyl alcohol           | 931                                     | 927                               | 201.51<br>b   | 174.37<br>b    | 2792.24<br>a   | 216.41<br>b    | 286.30<br>b    | 191.46<br>b   | 35.3<br>5   |
|                          | 24      | 1-Hexanol                   | 1352                                    | 1355                              | 126.10        | 103.59         | 105.78         | 182.05         | 83.55          | 137.40        | 28.4<br>4   |

|                                                 |    |                                                |      |      |         |         |         |         |         |         |        |
|-------------------------------------------------|----|------------------------------------------------|------|------|---------|---------|---------|---------|---------|---------|--------|
|                                                 | 25 | 1-Octen-3-ol                                   | 1449 | 1451 | 546.40c | 796.94c | 2023.49 | 3222.68 | 1682.69 | 2378.40 | 375.12 |
|                                                 |    |                                                |      |      |         |         | ab      | a       | bc      | ab      |        |
|                                                 | 26 | 1-Octanol                                      | 1558 | 1557 | 321.35c | 269.12  | 1078.54 | 1619.16 | 466.41c | 746.45  | 135.18 |
|                                                 |    |                                                |      |      | d       | d       | b       | a       | d       | bc      |        |
|                                                 | 27 | (Z)-5-Octen-1-ol                               | 1617 | 1619 | 94.50c  | 123.40c | 301.47  | 498.21a | 229.62  | 340.10a | 52.1   |
|                                                 |    |                                                |      |      |         |         | b       |         | bc      | b       | 9      |
|                                                 | 28 | alpha-Terpeneol                                | 1703 | 1706 | 7.18d   | 5.96d   | 16.37b  | 41.36a  | 10.79c  | 7.10d   | 0.87   |
|                                                 | 29 | Benzenemethanol                                | 1885 | 1890 | 53.18b  | 60.34b  | 81.88b  | 1016.79 | 67.36b  | 65.14b  | 37.7   |
|                                                 |    |                                                |      |      |         |         | a       |         |         |         | 3      |
|                                                 | 30 | 2-Ethyl-hexanoic acid                          | 1953 | 1964 | 37.19   | 70.81   | 125.19  | 54.25   | 4.86    | 86.57   | 27.8   |
|                                                 |    |                                                |      |      |         |         |         |         |         |         | 5      |
| Fatty acid                                      | 31 | Nonanoic acid                                  | 2171 | 2171 | 7812.41 | 9573.99 | 8646.77 | 10375.9 | 94.26b  | 11852.5 | 1695   |
|                                                 |    |                                                |      |      | a       | a       | a       | 9a      |         | 3a      | .85    |
|                                                 | 32 | Decanoic acid                                  | 2277 | 2289 | 132.77a | 149.64a | 136.16a | 174.71a | 21.03b  | 184.82a | 18.7   |
|                                                 |    |                                                |      |      |         |         |         |         |         |         | 7      |
|                                                 | 33 | Methyl-pyrazine                                | 1271 | 1266 | 63.40c  | 164.25  | 83.02c  | 89.44c  | 217.24a | 223.55a | 10.6   |
|                                                 |    |                                                |      |      | b       |         |         |         |         |         | 9      |
|                                                 | 34 | 2,5-Dimethyl-pyrazine                          | 1327 | 1320 | 908.38c | 2500.21 | 1251.54 | 1522.94 | 3034.71 | 3791.42 | 198.   |
|                                                 |    |                                                |      |      | b       | c       | c       | b       | a       |         | 72     |
|                                                 | 35 | 2,6-Dimethyl-pyrazine                          | 1333 | 1328 | 318.82c | 948.45  | 417.08c | 483.07c | 1244.16 | 1259.11 | 70.0   |
|                                                 |    |                                                |      |      | b       |         |         | a       | a       |         | 0      |
| Ni-tro-gen-con-tain-ing-hetero-cyclic-compounds | 36 | 2,3-Dimethyl-pyrazine                          | 1352 | 1344 | 26.34d  | 66.19b  | 39.29c  | 44.37c  | 87.65a  | 95.30a  | 4.70   |
|                                                 |    |                                                |      |      |         |         | d       |         |         |         |        |
|                                                 | 37 | 2-Ethyl-6-methyl-pyrazine                      | 1390 | 1387 | 51.92c  | 162.97  | 90.28c  | 90.58c  | 247.85a | 271.42a | 17.1   |
|                                                 |    |                                                |      |      | b       |         |         |         |         |         | 4      |
|                                                 | 38 | 2-Ethyl-5-methyl-pyrazine                      | 1397 | 1387 | 8.80d   | 26.27c  | 12.39d  | 16.22d  | 36.11b  | 47.90a  | 2.56   |
|                                                 | 39 | Trimethyl-pyrazine                             | 1408 | 1402 | 698.94c | 2252.85 | 1124.88 | 1333.00 | 2753.97 | 3548.70 | 222.   |
|                                                 |    |                                                |      |      | b       | c       | c       | b       | a       |         | 68     |
|                                                 | 40 | 2,3-Dimethyl-3-ethylpyrazine                   | 1450 | 1469 | 639.77c | 1551.66 | 1145.15 | 1571.32 | 1734.43 | 3044.94 | 193.   |
|                                                 |    |                                                |      |      | b       | bc      | b       | b       | a       |         | 99     |
|                                                 | 41 | 2,3-Dimethyl-5-ethylpyrazine                   | 1467 | 1469 | 139.38  | 434.30  | 230.97  | 290.20c | 548.71  | 847.38a | 59.0   |
|                                                 |    |                                                |      |      | d       | bc      | d       | d       | b       |         | 1      |
|                                                 | 42 | 2,5-Dimethyl-3-(3-methylbutyl)-pyrazine        | 1663 | 1666 | 16.82b  | 23.55b  | 18.84b  | 33.70b  | 33.12b  | 75.53a  | 6.19   |
|                                                 | 43 | 6,7-Dihydro-2,5-dimethyl-5H-cyclopentapyrazine | 1685 | 1672 | 1.24c   | 3.89b   | 1.52c   | 2.57c   | 4.42b   | 5.79a   | 0.42   |
|                                                 | 44 | 2-Acetylpyrrole                                | 1981 | 1973 | 291.74c | 892.01a | 283.50c | 376.75c | 1081.83 | 750.19  | 78.6   |
|                                                 |    |                                                |      |      | b       |         |         |         | a       | b       | 8      |
|                                                 | 45 | Methanethiol                                   | 677  | 692  | 330.79c | 660.03  | 310.79c | 1153.21 | 668.15  | 1089.64 | 103.   |
|                                                 |    |                                                |      |      | b       |         | a       | b       | a       |         | 67     |
| Sul-fur-con-tain-ing-compounds                  | 46 | Carbon disulfide                               | 734  | 735  | 259.90  | 316.99  | 157.40  | 158.36  | 229.24  | 2008.83 | 146.   |
|                                                 |    |                                                |      |      | b       | b       | b       | b       | b       | a       | 49     |
|                                                 | 47 | Dimethyltrisulfide                             | 1395 | 1398 | 7.96ab  | 8.62a   | 4.37c   | 5.74bc  | 6.42abc | 8.39ab  | 0.85   |
|                                                 | 48 | Methional                                      | 1465 | 1469 | 53.57c  | 35.48d  | 35.41d  | 62.04c  | 95.28b  | 121.44a | 7.36   |
|                                                 |    |                                                |      |      | d       |         |         |         |         |         |        |
|                                                 | 49 | 2-Acetylthiazole                               | 1660 | 1664 | 28.23c  | 47.72b  | 32.17bc | 37.84bc | 76.66a  | 75.04a  | 4.97   |
|                                                 | 50 | 2-Acetyl-2-thiazoline                          | 1773 | 1778 | 140.19  | 669.05a | 299.62c | 225.62c | 611.36a | 407.81  | 33.8   |
|                                                 |    |                                                |      |      | d       |         | d       |         | b       |         | 7      |
|                                                 | 51 | Dimethyl sulfone                               | 1913 | 1920 | 17.57c  | 366.34  | 34.22c  | 62.76c  | 81.52c  | 687.29a | 72.0   |
|                                                 |    |                                                |      |      | b       |         |         |         |         |         | 0      |
|                                                 | 52 | Benzothiazole                                  | 1977 | 1981 | 31.18c  | 33.85c  | 40.31bc | 62.53a  | 48.79b  | 32.46c  | 3.96   |
| Oxy-gen-                                        | 53 | 2-Pentyl-furan                                 | 1237 | 1241 | 121.18  | 183.14  | 347.92a | 659.81a | 436.56a | 585.80a | 97.1   |
|                                                 |    |                                                |      |      | b       | b       | b       |         | b       |         | 3      |

|                                   |    |                                    |      |      |               |               |                |               |                |                |             |
|-----------------------------------|----|------------------------------------|------|------|---------------|---------------|----------------|---------------|----------------|----------------|-------------|
| containing heterocyclic compounds | 54 | Furfural                           | 1473 | 1477 | 309.97<br>bc  | 318.73<br>bc  | 252.72c        | 257.16c       | 375.59a<br>b   | 457.66a        | 27.6<br>4   |
|                                   | 55 | Butyrolactone                      | 1645 | 1652 | 10.89d        | 22.98a<br>b   | 15.40c<br>d    | 19.00bc       | 27.68a         | 21.89a<br>b    | 1.94        |
|                                   | 56 | 2-Furanmethanol                    | 1663 | 1668 | 14.95a        | 14.77a        | 5.46c          | 8.17bc        | 11.75a<br>b    | 10.22b         | 1.25        |
|                                   | 57 | gamma-Octalactone                  | 1934 | 1938 | 8.89a         | 8.94a         | 4.37b          | 5.98b         | 5.83b          | 6.83ab         | 27.5<br>5   |
|                                   | 58 | Ethyl maltol                       | 2025 | 2050 | 6.00bc<br>d   | 4.45cd        | 3.66d          | 10.18a        | 8.19ab         | 6.42bc         | 0.74        |
| Esters                            | 59 | Octanoic acid, methyl ester        | 1395 | 1396 | 130.35<br>b   | 107.18<br>b   | 15.55c         | 43.01c        | 0.33c          | 256.22a        | 14.9<br>2   |
|                                   | 60 | alpha-Terpinenyl Acetate           | 1708 | 1692 | 6.80c         | 5.06c         | 11.12b         | 51.55a        | 7.42c          | 8.07bc         | 1.13        |
|                                   | 61 | 2-Butanone                         | 905  | 908  | 89.64c        | 135.71<br>b   | 100.78c        | 146.57a<br>b  | 153.80a<br>b   | 175.02a        | 10.6<br>3   |
|                                   | 62 | 2-Pentanone                        | 980  | 981  | 10.16         | 702.98        | 248.64         | 22.77         | 39.03          | 544.23         | 272.<br>51  |
|                                   | 63 | 2-Heptanone                        | 1186 | 1182 | 41.18b        | 45.96b        | 78.24a<br>b    | 120.94a       | 91.65a<br>b    | 114.49a        | 16.4<br>6   |
| Ketones                           | 64 | Acetoin                            | 1291 | 1298 | 1972.04<br>c  | 3855.65<br>b  | 3409.76<br>b   | 3471.91<br>b  | 5672.99<br>a   | 6381.39<br>a   | 299.<br>41  |
|                                   | 65 | 2,5-Octanedione                    | 1328 | 1319 | 357.12c       | 483.96<br>bc  | 1063.04<br>abc | 2632.37<br>a  | 2227.80<br>ab  | 1959.56<br>abc | 528.<br>03  |
|                                   | 66 | 6-Methyl-5-hepten-2-one            | 1343 | 1346 | 13.71d        | 17.53d        | 38.59bc        | 81.73a        | 28.71c         | 44.81b         | 3.37        |
|                                   | 67 | Methyl-cyclopentane                | 675  | 975  | 1507.13<br>d  | 2372.67<br>bc | 2042.57<br>bc  | 2462.13<br>b  | 1989.99<br>c   | 3005.83<br>a   | 130.<br>95  |
|                                   | 68 | Benzene                            | 946  | 957  | 26.53d        | 63.10d        | 450.39<br>b    | 227.50c       | 8.30d          | 712.05a        | 31.3<br>4   |
| Hydrocarbons                      | 69 | Toluene                            | 1045 | 1049 | 2749.03<br>c  | 3002.99<br>bc | 1815.72<br>c   | 2395.32<br>c  | 4207.19<br>b   | 8656.97<br>a   | 406.<br>51  |
|                                   | 70 | Undecane                           | 1101 | 1100 | 63.88b        | 58.68b        | 38.88bc        | 53.36b        | 1.30c          | 178.54a        | 14.5<br>2   |
|                                   | 71 | Ethylbenzene                       | 1133 | 1129 | 1006.73<br>c  | 854.48c<br>d  | 405.19<br>d    | 586.57c<br>d  | 1528.47<br>b   | 2903.28<br>a   | 157.<br>66  |
|                                   | 72 | p-Xylene                           | 1142 | 1138 | 1819.63<br>bc | 1506.62<br>cd | 693.13<br>d    | 1091.86<br>cd | 2612.19<br>b   | 5261.35<br>a   | 286.<br>26  |
|                                   | 73 | m-Xylene                           | 1148 | 1143 | 9309.34<br>c  | 8216.51<br>c  | 3750.99<br>d   | 5546.81<br>cd | 14191.22<br>7b | 26161.3<br>9a  | 1370<br>.99 |
|                                   | 74 | 1-Butyl-cyclohexene                | 1165 | 1187 | 28.18b        | 11.71bc       | 13.61bc        | 19.47bc       | 5.45d          | 55.45a         | 6.14        |
|                                   | 75 | o-Xylene                           | 1193 | 1199 | 1795.84<br>c  | 1564.96<br>cd | 729.02<br>d    | 1091.30<br>cd | 2659.37<br>b   | 4920.96<br>a   | 265.<br>31  |
|                                   | 76 | dl-Limonene                        | 1206 | 1211 | 95.25c        | 71.59c        | 61.10c         | 179.89<br>b   | 273.73a        | 272.94a        | 19.2<br>6   |
|                                   | 77 | Styrene                            | 1266 | 1270 | 270.99c       | 255.98c       | 191.05c        | 252.20c       | 722.88<br>b    | 1434.76<br>a   | 97.9<br>3   |
|                                   | 78 | Cymene                             | 1279 | 1269 | 21.00c        | 19.19c        | 13.66c         | 25.98c        | 43.80b         | 77.96a         | 4.74        |
|                                   | 79 | Tridecane                          | 1303 | 1300 | 201.15<br>b   | 153.69<br>b   | 77.35c         | 211.00<br>b   | 17.78d         | 282.10a        | 19.1<br>8   |
|                                   | 80 | 3-Pentyl-cyclohexene               | 1310 | 1289 | 43.56bc       | 40.63bc       | 26.58c         | 54.78b        | 0.00d          | 108.12a        | 6.97        |
|                                   | 81 | Tetradecane                        | 1403 | 1399 | 293.40<br>b   | 203.81<br>bc  | 212.67<br>bc   | 402.85a       | 143.89c        | 389.49a        | 29.3<br>3   |
|                                   | 82 | 1,3-bis(1,1-Dimethylethyl)-benzene | 1435 | 1427 | 1.18c         | 1.02c         | 1.41bc         | 28.55a        | 2.26bc         | 6.91b          | 1.71        |

|      |    |                             |      |      |                      |                      |         |                     |                     |                      |                   |
|------|----|-----------------------------|------|------|----------------------|----------------------|---------|---------------------|---------------------|----------------------|-------------------|
|      | 83 | 1,2,3,5-Tetramethyl-benzene | 1449 | 1422 | 19.66c               | 16.76c               | 71.77a  | 51.26b              | 41.67b              | 45.63b               | 3.24              |
|      | 84 | trans-Caryophyllene         | 1616 | 1595 | 5.95c                | 4.67c                | 4.48c   | 39.74a              | 29.45b              | 24.32b               | 2.02              |
|      | 85 | Heptadecane                 | 1704 | 1699 | 10.58d               | 11.77c <sub>d</sub>  | 15.91bc | 21.37a              | 10.72d              | 16.88b               | 1.40              |
|      | 86 | Naphthalene                 | 1762 | 1764 | 460.64 <sub>b</sub>  | 207.59c              | 251.41c | 621.15a             | 457.38 <sub>b</sub> | 386.35 <sub>b</sub>  | 32.7 <sub>5</sub> |
|      | 87 | Octadecane                  | 1793 | 1799 | 25.08c               | 9.45d                | 36.86b  | 53.58a              | 13.05d              | 31.53bc              | 2.81              |
|      | 88 | Trichloromethane            | 1024 | 1022 | 342.94 <sub>bc</sub> | 365.70 <sub>bc</sub> | 234.49c | 313.91c             | 575.03 <sub>b</sub> | 1722.66 <sub>a</sub> | 78.3 <sub>1</sub> |
|      | 89 | Chloro-benzene              | 1223 | 1233 | 1.65c                | 0.40c                | 0.32c   | 1.19c               | 34.76a              | 3.98b                | 0.45              |
| Oth- | 90 | N,N-dibutyl-formamide       | 1779 | 1757 | 328.56 <sub>b</sub>  | 275.72 <sub>b</sub>  | 549.36a | 543.77a             | 569.12a             | 652.44a              | 53.4 <sub>8</sub> |
| ers  | 91 | Anethole                    | 1841 | 1817 | 4.71d                | 4.42d                | 8.47bc  | 24.46a              | 6.28cd              | 9.07b                | 0.75              |
|      | 92 | 3-Methyl-phenol             | 2091 | 2099 | 58.68d               | 58.38d               | 107.68a | 97.27a <sub>b</sub> | 76.14bc             | 77.41bc              | 6.94              |

<sup>x</sup> Retention index (RI) calculated according to the retention times of n-alkanes standard (C<sub>6</sub>–C<sub>30</sub>).

<sup>y</sup> Retention index (RI) matched from NIST and WILEY libraries.

a–d different letters in the same row indicate significant differences at  $p < 0.05$ .

SEM, standard error of the mean.

BH, Bohai Black Cattle; JX, Jiaxian Red Cattle; YL, Yiling Cattle; WS, Wenshan Cattle; XJ, Xinjiang Brown Cattle; PL, Pingliang Red Cattle.

**Table S2.** Volatiles of odor activity values (OAVs)  $\geq 1$  of pan-fried steaks from different yellow cattle breeds.

| Compounds Information |                              |                               | OAV    |         |         |         |         |         |
|-----------------------|------------------------------|-------------------------------|--------|---------|---------|---------|---------|---------|
| NO.                   | Component Name               | Threshold( $\mu\text{g/kg}$ ) | BH     | JX      | YL      | WS      | XJ      | PL      |
| 1                     | Butanal                      | 15.90                         | 4.66   | 7.26    | 5.46    | 7.95    | 8.24    | 9.16    |
| 2                     | 3-Methyl-butanal             | 13.00                         | 4.13   | 6.92    | 3.95    | 5.66    | 10.75   | 15.88   |
| 3                     | Pentanal                     | 100.00                        | 0.79   | 0.87    | 2.00    | 3.76    | 2.75    | 3.28    |
| 4                     | Hexanal                      | 750.00                        | 3.46   | 3.82    | 10.17   | 16.66   | 12.73   | 15.39   |
| 5                     | Heptanal                     | 550.00                        | 1.13   | 0.86    | 2.29    | 5.64    | 2.63    | 3.91    |
| 6                     | Octanal                      | 248.00                        | 1.99   | 1.88    | 5.11    | 9.47    | 3.65    | 6.16    |
| 7                     | (E)-2-Heptenal               | 40.00                         | 0.56   | 0.67    | 1.44    | 2.34    | 2.15    | 2.04    |
| 8                     | Nonanal                      | 260.00                        | 7.63   | 6.43    | 26.61   | 47.12   | 13.88   | 23.59   |
| 9                     | (E)-2-Octenal                | 0.20                          | 805.31 | 969.79  | 2251.37 | 3205.95 | 2826.38 | 3300.03 |
| 10                    | Benzaldehyde                 | 4600.00                       | 3.23   | 4.65    | 4.08    | 5.92    | 5.32    | 7.03    |
| 11                    | (E)-2-Nonenal                | 0.69                          | 324.41 | 317.30  | 608.08  | 1215.69 | 804.42  | 1351.02 |
| 12                    | Benzeneacetaldehyde          | 30.00                         | 81.73  | 104.64  | 93.75   | 134.70  | 187.50  | 210.19  |
| 13                    | (E)-2-Undecenal              | 1.40                          | 89.70  | 90.35   | 204.08  | 294.01  | 151.90  | 267.48  |
| 14                    | (E,Z)-2,4-Decadienal         | 0.07                          | 166.90 | 190.99  | 393.99  | 654.37  | 489.81  | 633.65  |
| 15                    | (E,E)-2,4-Decadienal         | 10.00                         | 1.56   | 1.74    | 2.91    | 4.13    | 4.76    | 4.89    |
| 16                    | 4-Methoxy-benzaldehyde       | 27.00                         | 0.71   | 0.93    | 2.74    | 6.16    | 1.40    | 1.13    |
| 17                    | 1-Octen-3-ol                 | 100.00                        | 5.46   | 7.97    | 20.23   | 32.23   | 16.83   | 23.78   |
| 18                    | (Z)-5-Octen-1-ol             | 6.00                          | 15.75  | 20.57   | 50.25   | 83.03   | 38.27   | 56.68   |
| 19                    | 2-Ethyl-6-methyl-pyrazine    | 40.00                         | 1.30   | 4.07    | 2.26    | 2.26    | 6.20    | 6.79    |
| 20                    | 2,3-Dimethyl-3-ethylpyrazine | 1.00                          | 639.77 | 1551.66 | 1145.15 | 1571.32 | 1734.43 | 3044.94 |
| 21                    | 2,3-Dimethyl-5-ethylpyrazine | 1.00                          | 139.38 | 434.30  | 230.97  | 290.20  | 548.71  | 847.38  |
| 22                    | 2-Acetylpyrrole              | 100.00                        | 2.92   | 8.92    | 2.84    | 3.77    | 10.82   | 7.50    |
| 23                    | Methanethiol                 | 4.00                          | 82.70  | 165.01  | 77.70   | 288.30  | 167.04  | 272.41  |

---

|    |                         |         |        |        |        |        |        |        |
|----|-------------------------|---------|--------|--------|--------|--------|--------|--------|
| 24 | Carbon disulfide        | 5.00    | 51.98  | 63.40  | 31.48  | 31.67  | 45.85  | 401.77 |
| 25 | Dimethyltrisulfide      | 0.10    | 79.62  | 86.21  | 43.71  | 57.41  | 64.17  | 83.87  |
| 26 | 3-(Methylthio)-propanal | 1.80    | 29.76  | 19.71  | 19.67  | 34.47  | 52.93  | 67.47  |
| 27 | 2-Acetylthiazole        | 10.00   | 2.82   | 4.77   | 3.22   | 3.78   | 7.67   | 7.50   |
| 28 | 2-Acetyl-2-thiazoline   | 1.30    | 107.84 | 514.66 | 230.48 | 173.55 | 470.28 | 313.70 |
| 29 | Dimethyl sulfone        | 175.00  | 0.10   | 2.09   | 0.20   | 0.36   | 0.47   | 3.93   |
| 30 | 2-Pentyl-furan          | 14.50   | 8.36   | 12.63  | 23.99  | 45.50  | 30.11  | 40.40  |
| 31 | p-Xylene                | 1000.00 | 1.82   | 1.51   | 0.69   | 1.09   | 2.61   | 5.26   |
| 32 | m-Xylene                | 1100.00 | 8.46   | 7.47   | 3.41   | 5.04   | 12.90  | 23.78  |
| 33 | o-Xylene                | 1800.00 | 1.00   | 0.87   | 0.41   | 0.61   | 1.48   | 2.73   |
| 34 | Trichloromethane        | 307.00  | 1.12   | 1.19   | 0.76   | 1.02   | 1.87   | 5.61   |

---
